# Supplementary material for: A methylation-phosphorylation switch controls EZH2 stability and hematopoiesis
Source: eLife journal article supplement (doi:10.7554/elife.86168), 2024-02-12

Figure 1B-EZH2

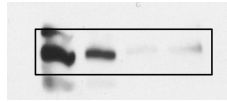

Figure 1B-SUZ12

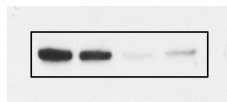

Figure 1B-EED

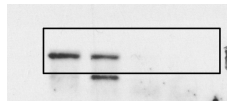

Figure 1B-LSD1

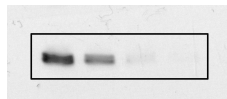

Figure 1B-Actin

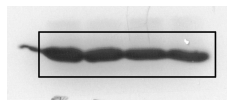

Figure 1D-EZH2

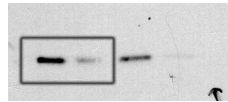

Figure 1D-SUZ12

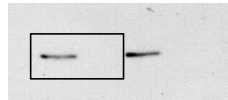

Figure 1D-EED

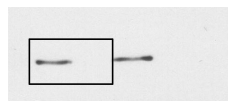

Figure 1D-LSD1

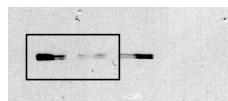

Figure 1D-Actin

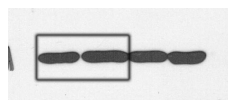

Figure 1D-H3K27me3

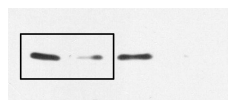

Figure 1D-H3

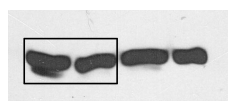

Figure 1E-EZH2

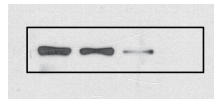

Figure 1E-LSD1

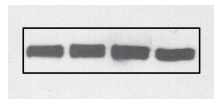

Figure 1E-Actin

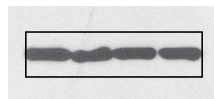

Figure 1F-EZH2

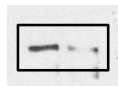

Figure 1F-LSD1

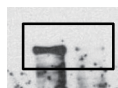

Figure 1F-H3K27me3

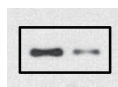

Figure 1F-H3

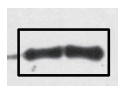

Figure 1G-EZH2

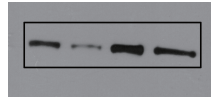

Figure 1G-LSD1

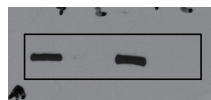

Figure 1G-Actin

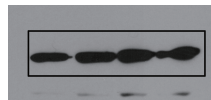

Supplement: fig1-data1 [file elife-86168-fig1-data1-v2.zip]
