# Supplementary material for: A methylation-phosphorylation switch controls EZH2 stability and hematopoiesis
Source: eLife journal article supplement (doi:10.7554/elife.86168), 2024-02-12

Figure 5A-EZH2

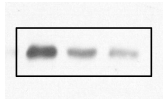

Figure 5A-EZH2-K20me

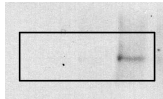

Figure 5A-EZH2-S21p

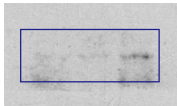

Figure 5A-Actin

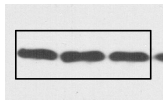

Figure 5A-H3K27me3

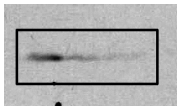

Figure 5A-H3

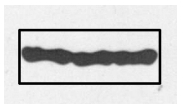

Figure 5C-EZH2

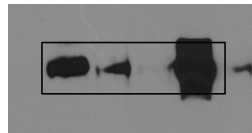

Figure 5C-L3MBTL3

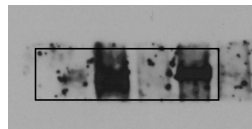

IP

Figure 5D-EZH2

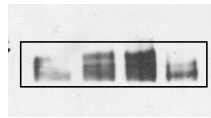

Figure 5D-L3MBTL3

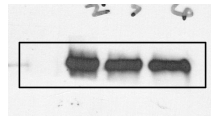

Figure 5D-EZH2

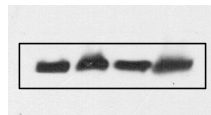

Figure 5D-SET7

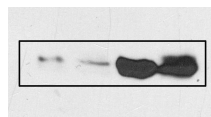

Input

Figure 5D-L3MBTL3

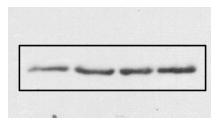

Figure 5D-Actin

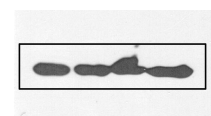

IP

Figure 5E-L3MBTL3

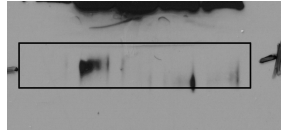

Figure 5E-HA-EZH2

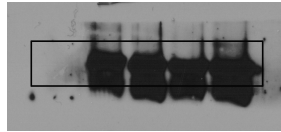

Figure 5E-SET7

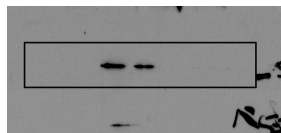

Figure 5E-HA-EZH2

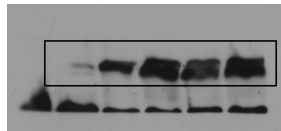

Input

Figure 5E-L3MBTL3

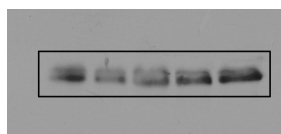

Figure 5E-Actin

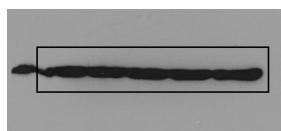



Figure 5F-Flag-EZH2

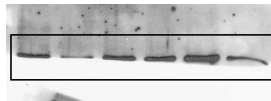

Figure 5F-Endogenous EZH2

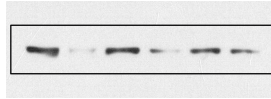

Figure 5F-EZH2-K20me

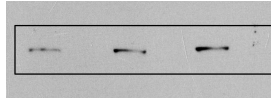

Figure 5F-LSD1

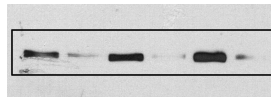

Figure 5F-Actin

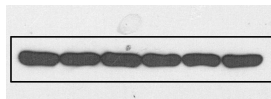

Figure 5F-H3K27me3

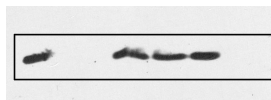

Figure 5F-H3

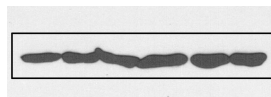

IP

Figure 5G-GFP

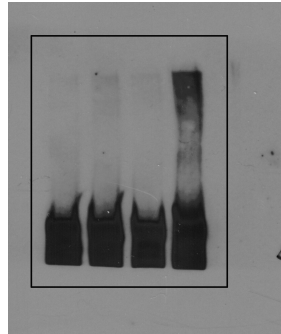

Figure 5G-SET7

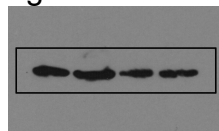

Figure 5G-Flag-DCAF5

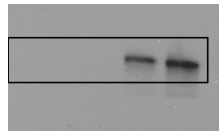

Input

Figure 5G-L3MBTL3

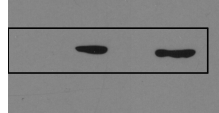

Figure 5G-GFP-EZH2

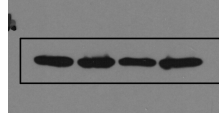

Figure 5G-Actin

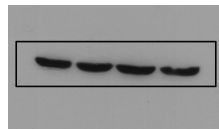

Figure 5H-GFP

IP

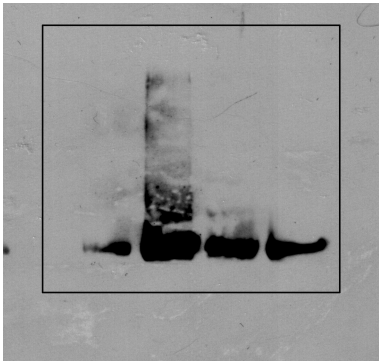

Figure 5H-SET7

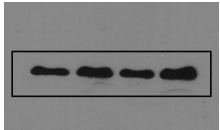

Figure 5H-Flag-DCAF5

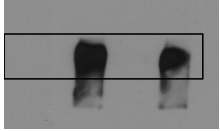

Input

Figure 5H-L3MBTL3

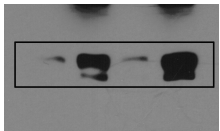

Figure 5H-GFP-EZH2

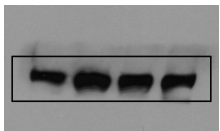

Figure 5H-Actin

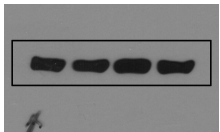

Supplement: fig5-data1 [file elife-86168-fig5-data1-v2.zip]
