# Supplementary material for: A methylation-phosphorylation switch controls EZH2 stability and hematopoiesis
Source: eLife journal article supplement (doi:10.7554/elife.86168), 2024-02-12

Figure 6A-H3K27<sub>me3</sub>

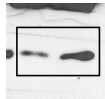

Figure 6A-H3

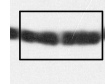

Figure 6A-AKT

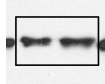

Figure 6A-pS473-AKT

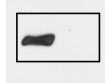

Figure 6A-EZH2

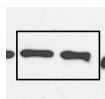

Figure 6A-Actin

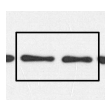

Figure 6B-H3K27<sub>me3</sub>

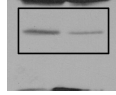

Figure 6B-H3

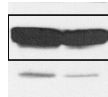

Figure 6B-EZH2-K20me

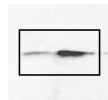

Figure 6B-EZH2-S21p

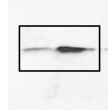

Figure 6B-EZH2

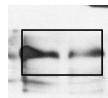

Figure 6B-pS473-AKT

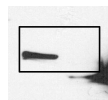

Figure 6B-pan-AKT

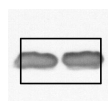

Figure 6C-ZH2

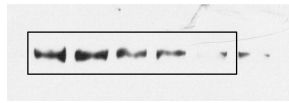

Figure 6C-EZH2-K20me

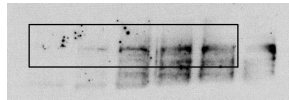

Figure 6C-EZH2-S21p

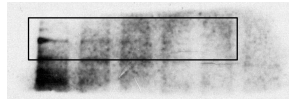

Figure 6C-p-AKT

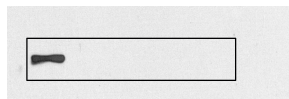

Figure 6C-AKT

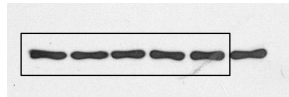

Figure 6C-H3K27

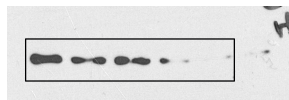

Figure 6C-H3

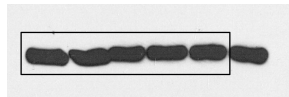

Figure 6D-H3K27<sub>me3</sub>

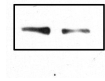

Figure 6D-H3

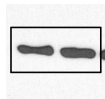

Figure 6D-EZH2

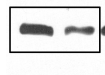

Figure 6D-HA-L3MBTL3

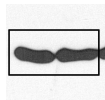

Figure 6D-pS473-AKT

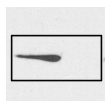

Figure 6D-AKT

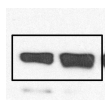



Figure 6E-H3K27<sub>me3</sub>

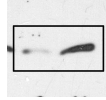

Figure 6E-H3

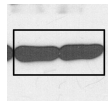

Figure 6E-EZH2

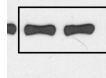

Figure 6E-pS473-AKT

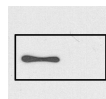

Figure 6E-AKT

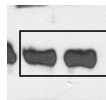

Figure 6F-H3K27<sub>me3</sub>

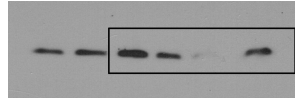

Figure 6F-H3

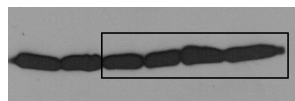

Figure 6F-EZH2

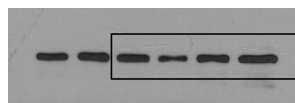

Figure 6F-pS473-AKT

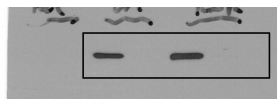

Figure 6F-AKT

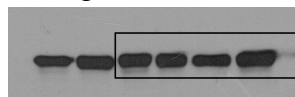

Figure 6F-Actin

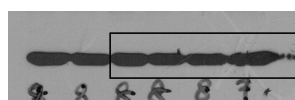

Figure 6G-H3K27<sub>me3</sub>

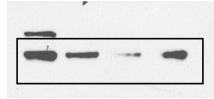

Figure 6G-H3

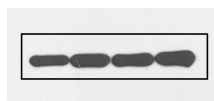

Figure 6G-EZH2

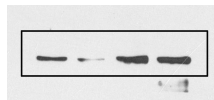

Figure 6G-pS473-AKT

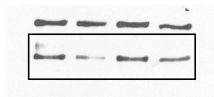

Figure 6G-AKT

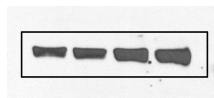

Figure 6G-Actin

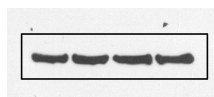

# Left panel

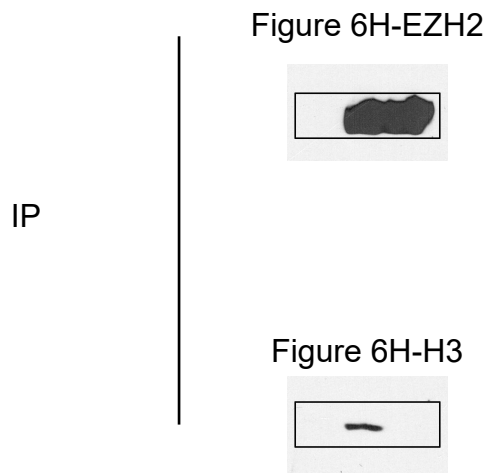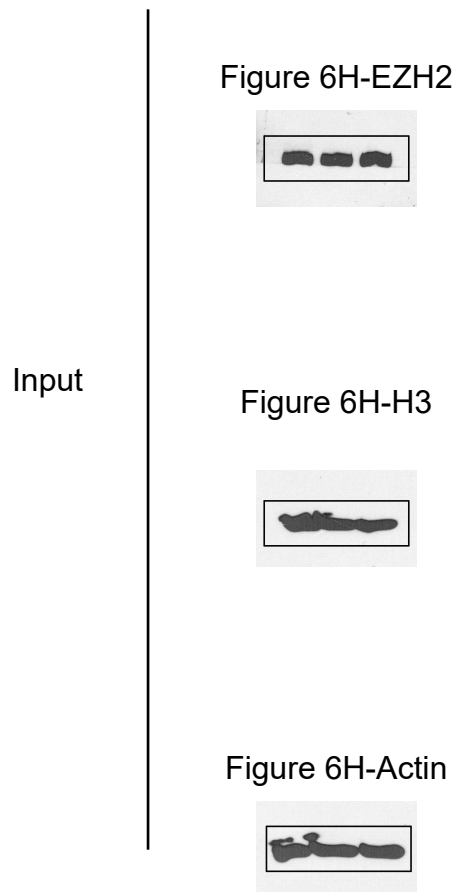

# Right panel

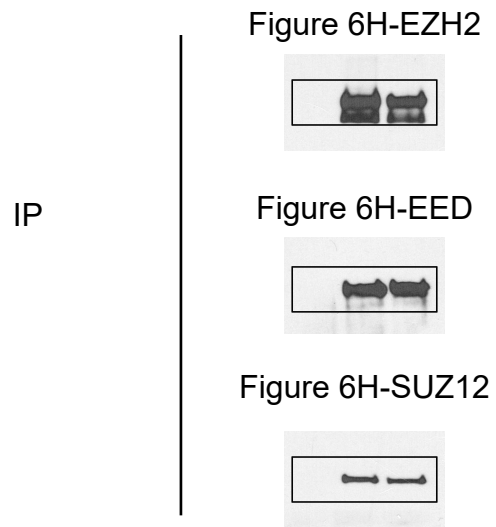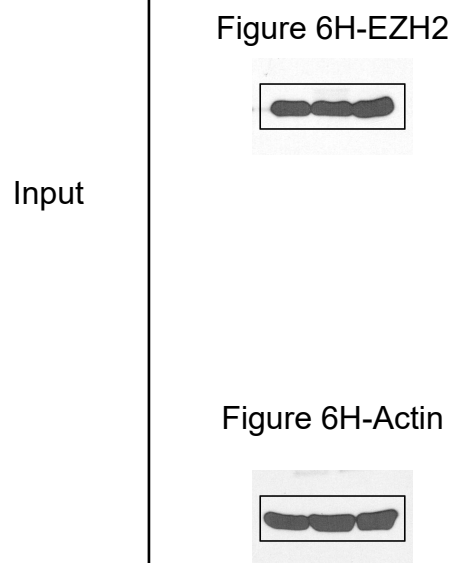

IP

Figure 6I-EZH2

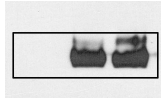

Figure 6I-H3

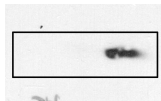

Input

Figure 6I-EZH2

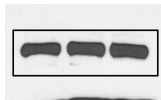

Figure 6I-AKT

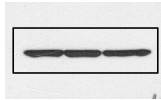

Figure 6I-H3

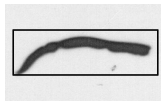

Figure 6I-pS473-AKT

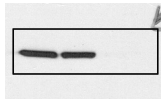

Figure 6I-AKT

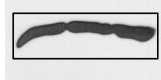

Supplement: fig6-data1 [file elife-86168-fig6-data1-v2.zip]
