# Supplementary material for: A methylation-phosphorylation switch controls EZH2 stability and hematopoiesis
Source: eLife journal article supplement (doi:10.7554/elife.86168), 2024-02-12

si-Luc

si-LSD1

Figure 6-figure supplement 1-HA-EZH2

Figure 6-figure supplement 1-HA-EZH2

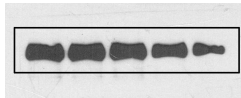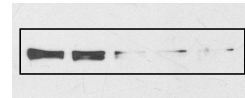

Figure 6-figure supplement 1-LSD1

Figure 6-figure supplement 1-LSD1

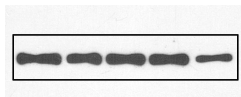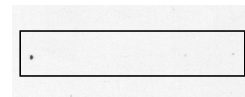

Figure 6-figure supplement 1-Actin

Figure 6-figure supplement 1-Actin

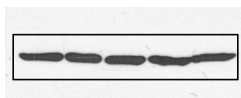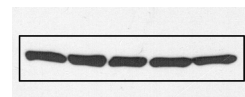

si-Luc

si-LSD1

Figure 6-figure supplement 1-HA-EZH2-K20R    Figure 6-figure supplement 1-HA-EZH2-K20R

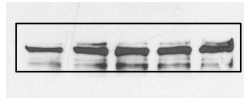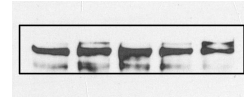

Figure 6-figure supplement 1-LSD1

Figure 6-figure supplement 1-LSD1

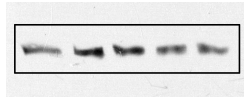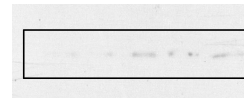

Figure 6-figure supplement 1-Actin

Figure 6-figure supplement 1-Actin

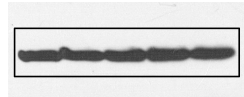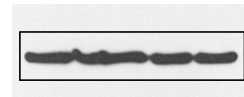

si-Luc

si-LSD1

Figure 6-figure supplement 1-HA-EZH2-K20R

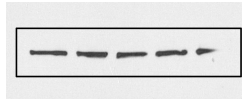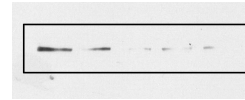

Figure 6-figure supplement 1-LSD1

Figure 6-figure supplement 1-LSD1

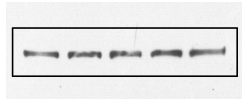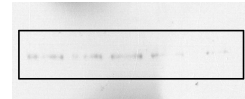

Figure 6-figure supplement 1-Actin

Figure 6-figure supplement 1-Actin

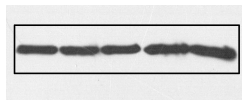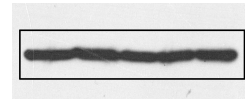

Supplement: fig6-figsupp1-data1 [file elife-86168-fig6-figsupp1-data1-v2.zip]
