# Supplementary material for: A methylation-phosphorylation switch controls EZH2 stability and hematopoiesis
Source: eLife journal article supplement (doi:10.7554/elife.86168), 2024-02-12

Fig.2-figure supplement -2A- EZH2

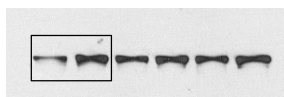

Fig.2-figure supplement -2A-Flag-L3MBTL3

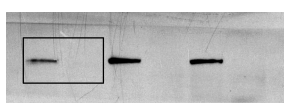

Fig.2-figure supplement -2A- GAPDH

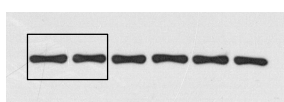

Fig.2-figure supplement -2B- EZH2

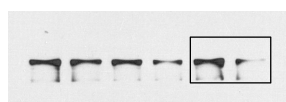

Fig.2-figure supplement -2B-Flag-L3MBTL3

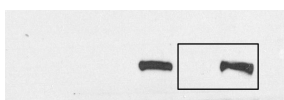

Fig.2-figure supplement -2B- GAPDH

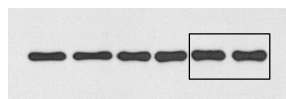

Supplement: fig2-figsupp2-data1 [file elife-86168-fig2-figsupp2-data1-v2.zip]
