# Supplementary material for: A methylation-phosphorylation switch controls EZH2 stability and hematopoiesis
Source: eLife journal article supplement (doi:10.7554/elife.86168), 2024-02-12

Figure 3B-DCAF5 PCR

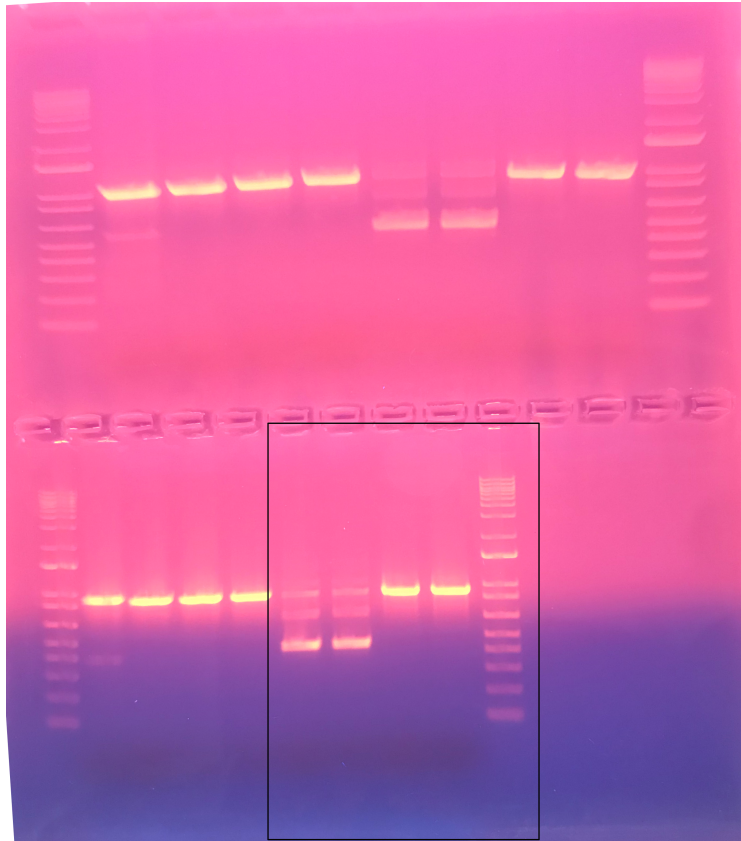

Figure 3C-EZH2

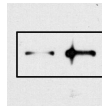

Figure 3C-DCAF5

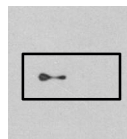

Figure 3C-Actin

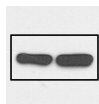

Figure 3C-H3K27me3

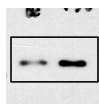

Figure 3C-H3

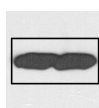

Figure 3E-Flag-EZH2

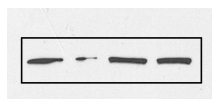

Figure 3E-Actin

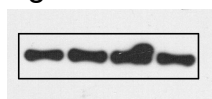

Figure 3E-DCAF5

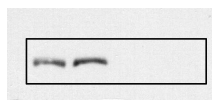

Figure 3E-LSD1

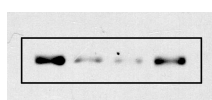

Figure 3F-Flag-EZH2

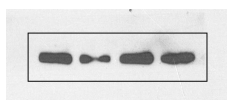

Figure 3F-Actin

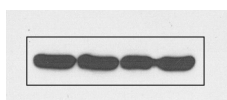

Figure 3F-DCAF5

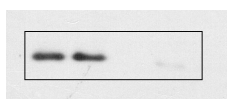

Figure 3F-LSD1

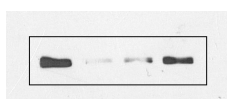

Supplement: fig3-data1 [file elife-86168-fig3-data1-v2.zip]
