# Supplementary material for: A methylation-phosphorylation switch controls EZH2 stability and hematopoiesis
Source: eLife journal article supplement (doi:10.7554/elife.86168), 2024-02-12

Figure 4-figure supplement 1-EZH2

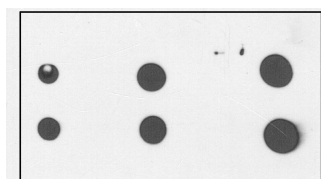

Figure 4-figure supplement 1-EZH2-K20me

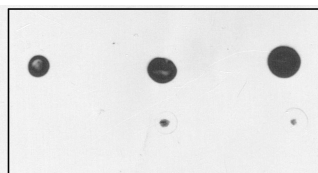

Figure 4-figure supplement 1-EZH2

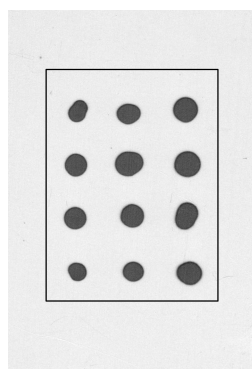

Figure 4-figure supplement 1-EZH2-K20me

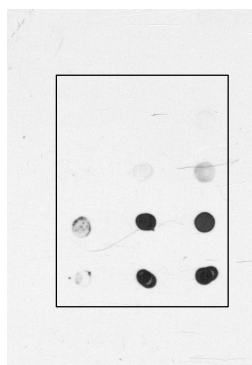

Supplement: fig4-figsupp1-data1 [file elife-86168-fig4-figsupp1-data1-v2.zip]
