# Supplementary material for: A methylation-phosphorylation switch controls EZH2 stability and hematopoiesis
Source: eLife journal article supplement (doi:10.7554/elife.86168), 2024-02-12

Figure 6-figure supplement 4B-EZH2

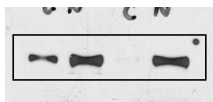

Figure 6-figure supplement 4B-H3

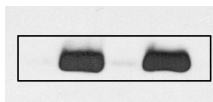

Figure 6-figure supplement 4B-Tubulin

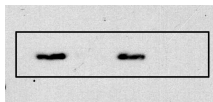

Figure 6-figure supplement 4C-EZH2

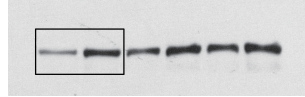

Figure 6-figure supplement 4C-SUZ12

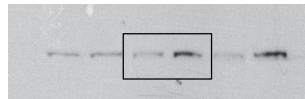

Figure 6-figure supplement 4C-GAPDH

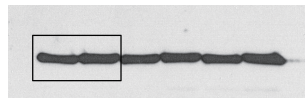

Figure 6-figure supplement 4C-H3K27me3

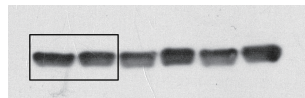

Figure 6-figure supplement 4C-H3

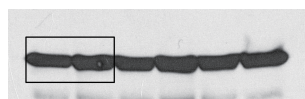

Supplement: fig6-figsupp4-data1 [file elife-86168-fig6-figsupp4-data1-v2.zip]
