# Supplementary material for: A methylation-phosphorylation switch controls EZH2 stability and hematopoiesis
Source: eLife journal article supplement (doi:10.7554/elife.86168), 2024-02-12

Figure 8C-EZH2

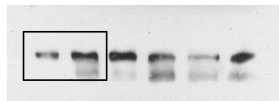

Figure 8C-H3K27me3

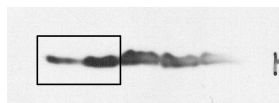

Figure 8C-H3

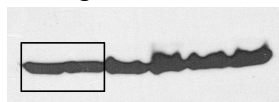

Figure 8C-pS473-AKT

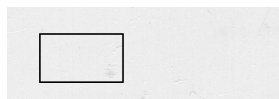

Figure 8C-pan-AKT

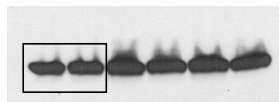

Figure 8E-EZH2

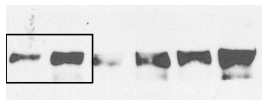

Figure 8E-EED

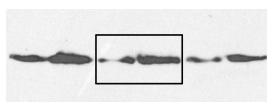

Figure 8E-SUZ12

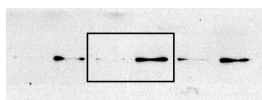

Figure 8E-GFI1B

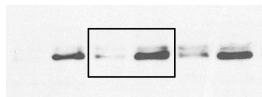

Figure 8E-pan-Actin

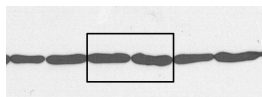

Supplement: fig8-data1 [file elife-86168-fig8-data1-v2.zip]
