# Supplementary material for: A methylation-phosphorylation switch controls EZH2 stability and hematopoiesis
Source: eLife. 2024 Feb 12;13:e86168. doi: 10.7554/eLife.86168 (PMC10901513; doi:10.7554/eLife.86168)
Supplement: Figure 1—source data 2. [file elife-86168-fig1-data2.xlsx]

## Sheet: Figure 1B
		Ctrl				Nestin>LSD1flfl
	EZH2	1.21127	0.62011	1.30861	0.427201	0.0539291	0.105871	0.03888	0.0208805
	SUZ12	0.828167	0.65675	0.802018	0.490706	0.0536297	0.109194	0.0164502	0.0674583
	EED	0.39248	0.285792	0.339579	0.0966669	0.0348863	0.0223335	0.0263745	0.024962
	LSD1	0.630789	0.362618	0.592219	0.388594	0.0726619	0.0393047	0.132079	0.0713372

## Sheet: Figure 1C 
		Control			Nestin-LSD1fl/fl
	target	Rep.1	Rep.2	Rep.3	Rep.1	Rep.2	Rep.3
	EZH2	0.980847	0.975773	1.04484	1.74348	1.62288	1.55626
	SUZ12	0.945731	1.02541	1.03118	1.03869	1.00242	0.932469
	EED	0.943324	1.01948	1.03982	1.2538	1.30461	1.23684
	LSD1	1.03051	0.904714	1.07259	0.559879	0.56835	0.531767

## Sheet: Figure 1D
		MEF cells: CAGG-CreTM;lsd1fl/fl
			ctrl			4-oh tam
			Rep.1	Rep.2	Rep.3	Rep.1	Rep.2	Rep.3
		EZH2	0.48627	0.411063	0.786441	0.148101	0.0500456	0.112558
		SUZ12	0.268853	0.299214	0.561651	0.0363555	0.0406642	0.0621449
		EED	0.232343	0.229088	0.2898	0.0191786	0.0164988	0.0459563
		LSD1	0.506536	0.322425	0.362527	0.131102	0.0564464	0.0340925
		H3K27me3	0.406408	0.346399	0.408853	0.111861	0.0178362	0.164776

## Sheet: Figure 1F
			siLuc			siLSD1
		rep.1	rep.2	rep.3	rep.1	rep.2	rep.3
	EZH2	0.372373	0.463526	0.585315	0.093454	0.160407	0.161849
	H3K27me3	0.637041	0.432282	0.709331	0.17475	0.181988	0.040241
