# Supplementary material for: A methylation-phosphorylation switch controls EZH2 stability and hematopoiesis
Source: eLife. 2024 Feb 12;13:e86168. doi: 10.7554/eLife.86168 (PMC10901513; doi:10.7554/eLife.86168)
Supplement: Figure 2—source data 2. [file elife-86168-fig2-data2.xlsx]

## Sheet: Figure 2A
		WT				L3MBTL3-KO
		Rep.1	Rep.2	Rep.3	Rep.4	Rep.1	Rep.2	Rep.3	Rep.4
	EZH2	0.758464	0.508581	0.489796	0.663033	1.72945	1.06564	1.21873	0.839304
	H3K27me3	0.0496172	0.100073	0.140365	0.0617096	0.283442	0.390779	0.368017	0.521459
	EZH2
	H3K27me3

## Sheet: Figure 2B
		ctrl			L3-KO MEFs
		Rep.1	Rep.2	Rep.3	Rep.1	Rep.2	Rep.3
	EZH2	0.567838	1.00002	0.523173	1.11722	1.50835	1.23984
	H3K27me3	0.549228	0.423797	0.584098	1.72045	0.837932	1.19743

## Sheet: Figure 2C
		Nestin>L3MBTL3fl/+			Nestin>L3MBTL3fl/fl
		Rep.1	Rep.2	Rep.3	Rep.1	Rep.2	Rep.3
	EZH2	0.336844	0.260291	0.267642	0.788117	0.54723	0.749972
	SUZ12	0.228008	0.127148	0.196063	0.620529	0.37604	0.475572

## Sheet: Figure 2F
				Column A			Column B			Column C			Column D
				si-Luc			si-LSD1			si-L+L3MBTL3			si-L3MBTL3
				Rep.1	Rep.2	Rep.3	Rep.1	Rep.2	Rep.3	Rep.1	Rep.2	Rep.3	Rep.1	Rep.2	Rep.3
			Relative Flag-EZH2 expression	3.36932	3.60305	1.48805	0.959436	0.976766	0.092703	3.25878	3.57903	1.84274	3.72737	3.53269	1.88104
			Column A vs Column B	P value	Mean of Luc	Mean of LSD1	Difference	SE of difference	t ratio	df	q value
				0.001256	3.05	1.233	1.817	0.224	8.111	4	0.001269
			Column B vs Column C

## Sheet: Figure 2G
				Column A			Column B			Column C			Column D
				si-Luc			si-LSD1-2			si-L+L3MBTL3-2			si-L3MBTL3-2
				Rep.1	Rep.2	Rep.3	Rep.1	Rep.2	Rep.3	Rep.1	Rep.2	Rep.3	Rep.1	Rep.2	Rep.3
			Relative Flag-EZH2 expression	1.18905	0.913244	1.53192	0.251043	0.265498	0.373526	1.78426	0.951849	1.62395	1.77361	1.31389	2.64652
			Column A vs Column B
			Column B vs Column C
