# Supplementary material for: A methylation-phosphorylation switch controls EZH2 stability and hematopoiesis
Source: eLife. 2024 Feb 12;13:e86168. doi: 10.7554/eLife.86168 (PMC10901513; doi:10.7554/eLife.86168)
Supplement: Figure 3—source data 2. [file elife-86168-fig3-data2.xlsx]

## Sheet: Figure 3C
		ctrl			DCAF5-KO Mice
		Rep.1	Rep.2	Rep.3	Rep.1	Rep.2	Rep.3
	EZH2	0.160145	0.047569	0.118643	0.539269	0.357243	0.66475
	H3K27me3	0.320733	0.356285	0.061104	0.534528	1.04122	0.785272

## Sheet: Figure 3E
		Column A			Column B			Column C			Column D
		si-Luc			si-LSD1			si-L+DCAF5			si-DCAF5
		Rep.1	Rep.2	Rep.3	Rep.1	Rep.2	Rep.3	Rep.1	Rep.2	Rep.3	Rep.1	Rep.2	Rep.3
	Relative Flag-EZH2 expression	0.415056	0.476279	0.35677	0.105671	0.249326	0.155271	0.38581	0.676995	0.38685	0.451168	0.630245	0.380063
	Column A vs Column B
	Column B vs Column C

## Sheet: Figure 3F
		Column A			Column B			Column C			Column D
		si-Luc			si-LSD1-2			si-L+DCAF5-2			si-DCAF5-2
		Rep.1	Rep.2	Rep.3	Rep.1	Rep.2	Rep.3	Rep.1	Rep.2	Rep.3	Rep.1	Rep.2	Rep.3
	Relative Flag-EZH2 expression	0.70977	0.629628	0.596484	0.19161	0.127511	0.290939	0.464259	0.668338	0.793928	0.540733	0.473535	0.728267
	Column A vs Column B
	Column B vs Column C
