# Supplementary material for: A methylation-phosphorylation switch controls EZH2 stability and hematopoiesis
Source: eLife. 2024 Feb 12;13:e86168. doi: 10.7554/eLife.86168 (PMC10901513; doi:10.7554/eLife.86168)
Supplement: Figure 4—source data 2. [file elife-86168-fig4-data2.xlsx]

## Sheet: Figure 4I
	Column A			Column B			Column C			Column D
	si-Luc			si-LSD1			si-L+SET7			si-SET7
	Rep.1	Rep.2	Rep.3	Rep.1	Rep.2	Rep.3	Rep.1	Rep.2	Rep.3	Rep.1	Rep.2	Rep.3
Relative Flag-EZH2 expression	0.479637	0.695219	0.318901	0.122537	0.241474	0.130453	0.515095	0.671635	0.532287	0.495744	0.882192	0.581946
Column A vs Column B
Column B vs Column C

## Sheet: Fig.4-figure supplement 2B
	Column A			Column B			Column C			Column D
	si-Luc			si-LSD1-2			si-L+SET7-2			si-SET7-2
	Rep.1	Rep.2	Rep.3	Rep.1	Rep.2	Rep.3	Rep.1	Rep.2	Rep.3	Rep.1	Rep.2	Rep.3
Relative Flag-EZH2 expression	0.878468	1.07027	1.39754	0.089147	0.084645	0.280822	0.773157	0.849624	0.629141	1.52475	0.972178	0.857649
Column A vs Column B
Column B vs Column C
