# Supplementary material for: A methylation-phosphorylation switch controls EZH2 stability and hematopoiesis
Source: eLife. 2024 Feb 12;13:e86168. doi: 10.7554/eLife.86168 (PMC10901513; doi:10.7554/eLife.86168)
Supplement: Figure 5—source data 2. [file elife-86168-fig5-data2.xlsx]

## Sheet: Figure 5F
					Column A			Column B
					si-Luc			si-LSD1
			Relative H3K27me3 expression		Rep.1	Rep.2	Rep.3	Rep.1	Rep.2	Rep.3
			WT		0.775178	1.28853	0.854566	0.394181	0.405406	0.0851741
			K20R		0.313613	0.615653	0.9593	0.386919	0.550915	0.898165
			S21A		0.790521	0.699954	0.947505	0.106758	0.250001	0.0882694
		WT
		K20R
		S21A

## Sheet: 1
		E12			E16			E18			P0
		rep.1	rep.2	rep.3	rep.1	rep.2	rep.3	rep.1	rep.2	rep.3	rep.1	rep.2	rep.3
	LSD1	0.948246	1.02337	1.03049	0.961483	0.948246	0.935191	0.400535	0.45376	0.441351	0.269807	0.258816	0.22688
	L3MBTL3	1	1.76541	0.566442	3147.52	3104.19	2977.74	1946.5	2015.14	1960.04	1357.43	1338.75	1293.14
	EZH2	0.909618	1.03766	1.05946	0.703847	0.718636	0.733736	0.435275	0.466516	0.450625	0.264255	0.255253	0.271684
	SET7	0.886791	1.17013	0.963707	2.60268	1.46409	2.36199	0.314253	0.408951	0.61132	0.270431	0.233798	0.404254
	DCAF5	0.97716	1.04006	0.983957	2.47942	1.95884	1.05702	0.817902	1.29235	0.752623	0.467596	0.477421	0.612734
