# Supplementary material for: A methylation-phosphorylation switch controls EZH2 stability and hematopoiesis
Source: eLife. 2024 Feb 12;13:e86168. doi: 10.7554/eLife.86168 (PMC10901513; doi:10.7554/eLife.86168)
Supplement: Figure 6—source data 2. [file elife-86168-fig6-data2.xlsx]

## Sheet: Figure 6A
			si-Luc			si-LSD1
			Rep.1	Rep.2	Rep.3	Rep.1	Rep.2	Rep.3	p value
		EZH2	0.622082	0.617612	0.981935	0.348519	0.30299	0.198663	0.0236924
		H3K27me3	0.589128	0.623996	0.99647	0.172531	0.220477	0.38123	0.0298358
		EZH2
		H3K27me3

## Sheet: Figure 6D
			DMSO			MK2206
			Rep.1	Rep.2	Rep.3	Rep.1	Rep.2	Rep.3	p value
		EZH2	1.07536	0.59069	0.879846	0.510457	0.351362	0.232802	0.0405942
		H3K27me3	0.519107	0.519018	0.846748	0.228386	0.199347	0.0879111	0.017686
		EZH2
		H3K27me3

## Sheet: Figure 6E
	DMSO			MK2206
	Rep.1	Rep.2	Rep.3	Rep.1	Rep.2	Rep.3	p value
EZH2	0.509021	0.734387	0.684267	0.512834	0.622338	0.666483	0.636161
H3K27me3	0.065293	0.0551519	0.0142763	0.428265	0.244219	0.679519	0.0331531
		EZH2
		H3K27me3

## Sheet: Figure6F
			WT-MEF						K20R-MEF
			DMSO			MK2206			DMSO			MK2206
			Rep.1	Rep.2	Rep.3	Rep.1	Rep.2	Rep.3	Rep.1	Rep.2	Rep.3	Rep.1	Rep.2	Rep.3
	EZH2		0.73918	0.553561	0.78431	0.434874	0.124002	0.353625	0.648668	0.619188	1.46123	0.694486	0.674544	1.3277
	H3K27me3		0.574867	0.851718	0.599039	0.304015	0.278724	0.0327235	0.0421579	0.130066	0.0855907	0.449667	0.571748	0.971047
									p value
							Treatment		DMSO or MK2206
							MEF cell Genotype:		WT		K20R
							Compare		DMSO vs MK2206	WT vs K20R	DMSO vs MK2206
							EZH2		0.0293099	0.487886	0.976853
							H3K27me3		0.0191502	0.00306375	0.022243

## Sheet: Fig.6-figure supplement 4D 
		wt			k20r
	group	1	2	3	1	2	3	p-value
	day1	0.4	0.4	0.4	0.4	0.4	0.4	1
	day3	0.54	0.568	0.648	0.544	0.552	0.58	0.478509
	day5	0.86	0.76	0.808	0.652	0.68	0.636	0.00833349
	day7	1.312	1.24	1.22	2.06	1.96	2.004	0.000608337
	day9	2.404	2.32	2.38	3.972	3.912	3.956	1.99729e-05
	day11	2.44	2.492	2.42	5.28	5.356	5.1	0.000426749
