# Supplementary material for: A methylation-phosphorylation switch controls EZH2 stability and hematopoiesis
Source: eLife. 2024 Feb 12;13:e86168. doi: 10.7554/eLife.86168 (PMC10901513; doi:10.7554/eLife.86168)
Supplement: Figure 7—source data 2. [file elife-86168-fig7-data2.xlsx]

## Sheet: Figure 7A-B
		6-7M spleen (mg)					6-7M liver (g)
		WT	K20R				WT	K20R
	group 1	71.2	99.8			group 1	2.1251	3.354
	group 2	68.5	75.1			group 2	2.052	2.282
	group 3	70.3	75.5			group 3	1.988	2.234
	group 4	75.6	81.4			group 4	2.203	2.182
	group 5	80.1	98.6			group 5	1.898	2.544
	group 6	83.3	113			group 6	1.965	2.303

## Sheet: Fig.7C-I Fig. 7-fig sup-1A-C
	live cells	B220+ B cells	CD4+ T cells	CD8+ T cells	Ly6.6G	Gr-1+/Mac1+
WT-1-MMATURE	0.873	0.15	0.0072	0.0064	0.55	0.623
WT-2-MMATURE	0.656	0.155	0.0111	0.0105	0.481	0.492
WT-3-MMATURE	0.864	0.117	0.0088	0.0076	0.604	0.482
WT-4-MMATURE	0.892	0.151	0.0132	0.0117	0.525	0.388
WT-5-MMATURE	0.941	0.151	0.0102	0.0098	0.554	0.551
WT-6-MMATURE	0.862	0.194	0.0156	0.0166	0.479	0.53
WT-7-MMATURE	0.85	0.128	0.0144	0.0193	0.471	0.605
WT-8-MMATURE	0.85	0.181	0.036	0.0354	0.337	0.476
WT-9-MMATURE	0.878	0.138	0.0134	0.0238	0.433	0.569
EZH2-K20R-1-MMATURE	0.861	0.164	X	0.0022	0.613	0.667
EZH2-K20R-2-MMATURE	0.623	0.0247	0.0039	0.0019	0.804	0.557
EZH2-K20R-3-MMATURE	0.855	0.0533	0.0063	0.0023	0.612	0.512
EZH2-K20R-4-MMATURE	0.896	0.0944	0.0094	0.0098	0.564	0.43
EZH2-K20R-5-MMATURE	0.891	0.115	0.0096	0.0156	0.597	0.562
EZH2-K20R-6-MMATURE	0.818	0.149	0.0145	0.0152	0.508	0.564
EZH2-K20R-7-MMATURE	0.818	0.1395	0.012	0.0132	0.556	0.585
EZH2-K20R-8-MMATURE	0.844	0.0942	0.0118	0.0152	0.497	0.631
EZH2-K20R-9-MMATURE	0.895	0.198	0.013	0.0146	0.532	0.645
	cell number (million)	B220+ B cells	CD4+ T cells	CD8+ T cells	Ly6.6G	Gr-1+/Mac1+
WT-1-MMATURE	28	4.2	0.2016	0.1792	15.4	17.444
WT-2-MMATURE	44	6.82	0.4884	0.462	21.16	21.65
WT-3-MMATURE	36	4.212	0.3168	0.2736	21.744	17.352
WT-4-MMATURE	32.8	4.9528	0.43296	0.38376	17.22	12.7264
WT-5-MMATURE	39.6	5.9796	0.40392	0.38808	21.9384	21.8196
WT-6-MMATURE	45.2	8.7688	0.70512	0.75032	21.6508	23.956
WT-7-MMATURE	38.4	4.9152	0.55296	0.74112	18.0864	23.232
WT-8-MMATURE	38.4	6.9504	1.3824	1.35936	12.9408	18.2784
WT-9-MMATURE	40.6	5.6028	0.54404	0.96628	17.5798	23.1014
EZH2-K20R-1-MMATURE	58.5	9.594	X	0.1287	35.8605	39.0195
EZH2-K20R-2-MMATURE	67.8	1.67	0.26442	0.12882	54.5112	37.76
EZH2-K20R-3-MMATURE	67.2	3.58176	0.42336	0.15456	41.1264	34.4064
EZH2-K20R-4-MMATURE	60.6	5.72064	0.56964	0.59388	34.1784	26.058
EZH2-K20R-5-MMATURE	55.2	6.348	0.52992	0.86112	32.9544	31.0224
EZH2-K20R-6-MMATURE	66	9.834	0.957	1.0032	33.528	37.224
EZH2-K20R-7-MMATURE	46.8	6.5286	0.5616	0.61776	26.0208	27.378
EZH2-K20R-8-MMATURE	45.3	4.26726	0.53454	0.68856	22.5141	28.5843
EZH2-K20R-9-MMATURE	69.7	13.8006	0.9061	1.01762	37.0804	44.9565
	Total BM x106	FITC-Zombie staining	no-depletion for lk/lsk	lineage depletion	after depletion	depletion rate	lin- cell percentage after depletioon	lk percentage	LK of depletion percentage	LK percentage of parent	lk total cells	lsk percentage of depletion	GMP percentage	GMP percentage of parent	GMP TOTAL	CMP percentage	CMP percentage of parent	CMP TOTAL	MEP percentage	MEP percentage of parent	MEP TOTAL	lsk	lsk of parent	lsk total cells x10
EZH2-WT-iMATURE_008.fcs 11/20/2022	40.6	35	10	20	3.78	0.811	0.655	0.097	0.063535	0.0120081	0.487529	0.0091	0.424	0.00509144	0.206712	0.259	0.0031101	0.12627	0.153	0.00183724	0.074592	0.0059605	0.00112653	0.457373
EZH2-WT-iMATURE_007.fcs 11/19/2022	38.4	35	10	20	3.06	0.847	0.56	0.121	0.06776	0.0103673	0.398104	0.0154	0.432	0.00447866	0.171981	0.146	0.00151362	0.0581231	0.172	0.00178317	0.0684738	0.008624	0.00131947	0.506677
EZH2-WT-iMATURE_006.fcs 11/18/2022	45.2	35	10	20	3.88	0.806	0.738	0.116	0.085608	0.016608	0.750679	0.01	0.41	0.00680926	0.307779	0.21	0.00348767	0.157643	0.148	0.00245798	0.111101	0.00738	0.00143172	0.647137
EZH2-WT-iMATURE_005.fcs 11/16/2022	38.4	35	10	20	3.22	0.839	0.735	0.16	0.1176	0.0189336	0.72705	0.0159	0.385	0.00728944	0.279914	0.185	0.00350272	0.134504	0.13	0.00246137	0.0945165	0.0116865	0.00188153	0.722506
EZH2-WT-iMATURE_004.fcs 11/15/2022	32.8	35		20	3.35	0.8325	0.774	0.0918	0.0710532	0.0119014	0.390366	0.0104	0.287	0.0034157	0.112035	0.122	0.00145197	0.0476247	0.0466	0.000554606	0.0181911	0.0080496	0.00134831	0.442245
EZH2-WT-iMATURE_003.fcs 10/30/2022 missing	39.6			20	3.04	0.848	0.456	0.2256	0.102874	0.0156368	0.619217	0.022										0.010032	0.00152486	0.603846
EZH2-WT-iMATURE_002.fcs 10/25/2022	44			20	3.21	0.8395	0.503	0.2	0.1006	0.0161463	0.710437	0.0175	0.323	0.00521525	0.229471	0.234	0.00377823	0.166242	0.184	0.00297092	0.13072	0.0088025	0.0014128	0.621633
EZH2-WT-iMATURE_001.fcs 10/21/2022	28			20	3.31	0.8345	0.55	0.165	0.09075	0.0150191	0.420536	0.0199										0.010945	0.0018114	0.507191
Average	38.375	35	10	20	3.35625	0.832188	0.621375	0.14705	0.0874725	0.0145776	0.56299	0.015025	0.376833	0.00538329	0.217982	0.192667	0.00280739	0.115068	0.138933	0.00201088	0.0829324	0.00893501	0.00148208	0.563576
EZH2-K20R-iMATURE_008.fcs 11/20/2022	69.7	35	10	20	4.65	0.7675	0.487	0.139	0.067693	0.0157386	1.09698	0.0094	0.426	0.00670465	0.467314	0.229	0.00360414	0.251209	0.145	0.0022821	0.159062	0.0045778	0.00106434	0.741844
EZH2-K20R-iMATURE_007.fcs 11/19/2022	45.3	35	10	20	4.52	0.774	0.631	0.178	0.112318	0.0253839	1.14989	0.0305	0.359	0.00911281	0.41281	0.2	0.00507677	0.229978	0.195	0.00494985	0.224228	0.0192455	0.00434948	1.97032
EZH2-K20R-iMATURE_006.fcs 11/18/2022	66	35	10	20	3.2	0.84	0.668	0.215	0.14362	0.0229792	1.51663	0.018	0.398	0.00914572	0.603618	0.17	0.00390646	0.257827	0.172	0.00395242	0.26086	0.012024	0.00192384	1.26973
EZH2-K20R-iMATURE_005.fcs 11/16/2022	46.8	35	10	20	2.92	0.854	0.702	0.149	0.104598	0.0152713	0.714697	0.0171	0.33	0.00503953	0.23585	0.193	0.00294736	0.137937	0.177	0.00270302	0.126501	0.0120042	0.00175261	0.820223
EZH2-K20R-iMATURE_004.fcs 11/15/2022	60.6	35		20	2.7	0.865	0.807	0.12	0.09684	0.0130734	0.792248	0.0071	0.29	0.00379129	0.229752	0.13	0.00169954	0.102992	0.0411	0.000537317	0.0325614	0.0057297	0.00077351	0.468747
EZH2-K20R-iMATURE_003.fcs 10/30/2022 missing	55.2			20	2.64	0.868	0.528	0.24	0.12672	0.016727	0.923333	0.0285										0.015048	0.00198634	1.09646
EZH2-K20R-iMATURE_002.fcs 10/25/2022	67.8			20	2.69	0.8655	0.512	0.254	0.130048	0.0174915	1.18592	0.0409	0.275	0.00481015	0.326128	0.198	0.00346331	0.234812	0.184	0.00321843	0.218209	0.0209408	0.00281654	1.90961
EZH2-K20R-iMATURE_001.fcs 10/21/2022	58.5			20	2.2	0.89	0.526	0.335	0.17621	0.0193831	1.13391	0.0263										0.0138338	0.00152172	0.890205
Average	58.7375	35	10	20	3.19	0.8405	0.607625	0.20375	0.119756	0.018256	1.0642	0.022225	0.346333	0.00643403	0.379245	0.186667	0.0034496	0.202459	0.15235	0.00294052	0.170237	0.0129255	0.00202355	1.14589
				WT						K20R
				Rep.1	Rep.2	Rep.3	Rep.4	Rep.5	Rep.6	Rep.1	Rep.2	Rep.3	Rep.4	Rep.5	Rep.6
			GMP	0.206712	0.171981	0.307779	0.279914	0.112035	0.229471	0.467314	0.41281	0.603618	0.23585	0.229752	0.326128
			CMP	0.12627	0.0581231	0.157643	0.134504	0.0476247	0.166242	0.251209	0.229978	0.257827	0.137937	0.102992	0.234812
			MEP	0.074592	0.0684738	0.111101	0.0945165	0.0181911	0.13072	0.159062	0.224228	0.26086	0.126501	0.0325614	0.218209

## Sheet: Figure 7J
	WT			K20R
target	Rep.1	Rep.2	Rep.3	Rep.1	Rep.2	Rep.3
GFI1	0.963753	1.0285	1.00885	0.253115	0.261261	0.259581
SUZ12	1.00952	1.03272	0.959181	0.453433	0.488846	0.480159
GFI1B	0.98374	0.993163	1.02353	0.124944	0.113907	0.111548
EZH2	1.01123	0.985897	1.00304	0.0835226	0.0851525	0.0799461
GATA2	0.99629	0.915622	1.09622	0.240817	0.241234	0.21777
GATA3	1.14279	1.15451	0.757946	0.114074	0.178563	0.154387
IKARUS	1.02653	0.961168	1.01352	0.682043	0.666555	0.664429
GATA4	0.891436	0.958984	1.16976	0.0612235	0.0614909	0.0624227
FOG	1.02293	0.99089	0.98657	0.0581808	0.0606415	0.0618657
Etv6	1.04237	0.938075	1.02268	0.587087	0.623884	0.747252
Hes1	0.000246256	0.000280244	1.44903e+07	2.24687e-05	1.98633e-05	1.53624e-05
FOS	0.731186	1.50162	0.910777	4.36868	4.41254	4.59623
GATA1	1.03506	0.99393	0.972026	0.0673058	0.0679259	0.0728365
EED	1.16965	0.464152	1.84198	0.330238	0.313052	0.3168
Runx1	0.998585	1.00898	0.992501	0.456282	0.437493	0.399981

## Sheet: Fig.7-fig sup-1D
	Control			K20R
Strc	1.03527	0.835088	1.15669	0.092997	0.139984	0.158586
Syngap1	0.95705	0.983957	1.06191	0.655197	0.607097	0.632878
Bmi1	1.02101	1.02811	0.952638	0.726986	0.68302	0.687771
Ltgb5	1.03049	1.00231	0.968171	0.756109	0.816014	0.810378
Ppfia4	0.990801	1.11471	0.905425	0.779165	0.806642
ATF4	0.997692	1.01866	0.983957	0.844791	0.838956	0.833161
Rnux3	0.926588	1.06437	1.01396	0.83702	0.791869	0.825496
NTRK3	1.04608	0.955945	1	0.699793	0.91067	0.843816
Irf8	0.866537	1.06683	1.08172	0.911722	0.725309	0.97041
Slc4a8	0.880666	1.13813	0.997692	0.864537	0.888843	0.90125
IK2F1	1.00928	0.981686	1.00928	0.842842	0.872564	0.915945
Sulf2	0.99539	1.00928	0.99539	0.911722	0.950439	1.01162
IL6ra	0.993093	1.01396	0.993093	0.920188	0.882703	1.00696
BGN	1.04247	0.993093	0.965936	0.972655	0.946058	1.09429
LpL	1.03049	0.968171	1.00231	0.997692	1.01162	1.00463
Mmp9	0.959264	1.03526	1.00696	1.10445	1.06683	1.03049
Sptbn1	0.961483	1.00928	1.03049	1.19472	1.20303	1.08423
Cacna1b		0.843816	1.18509	1.21279	1.22972	0.938438

## Sheet: Fig.7-fig sup-2
	live cells	B220+ B cells	CD4+ T cells	CD8+ T cells	Ly6.6G	Gr-1+/Mac1+
Ctrl-1-MMATURE 2022/12/07 9M-♀	0.912	0.174	0.016	0.025	0.441	0.534
vav-iCre;l3mbtl3fl/fl-1-MMATURE 2022/12/07 9M-♀	0.871	0.207	0.0152	0.0167	0.491	0.553
	cell number (million)	B220+ B cells	CD4+ T cells	CD8+ T cells	Ly6.6G	Gr-1+/Mac1+
Ctrl-1-MMATURE 2022/12/07 9M-♀	47.4	8.2476	0.7584	1.185	20.9034	25.3116
		0	0	0	0	0
		0	0	0	0	0
vav-iCre;l3mbtl3fl/fl-1-MMATURE 2022/12/07 9M-♀	63.2	13.0824	0.96064	1.05544	31.0312	34.9496
