# Supplementary material for: A methylation-phosphorylation switch controls EZH2 stability and hematopoiesis
Source: eLife. 2024 Feb 12;13:e86168. doi: 10.7554/eLife.86168 (PMC10901513; doi:10.7554/eLife.86168)
Supplement: Figure 8—source data 2. [file elife-86168-fig8-data2.xlsx]

## Sheet: Figure 8C
				WT			K20R
				Rep.1	Rep.2	Rep.3	Rep.1	Rep.2	Rep.3
			EZH2	0.242991	0.201649	0.082704	0.477603	0.659451	0.368648
			H3K27me3	0.366776	0.068515	0.075076	0.756488	0.395492	0.619372

## Sheet: Figure 8D
		Rep.1	Rep.2	Rep.3	Rep.1	Rep.2	Rep.3
	GFI1	0.608502	0.600124	2.7384	2.26054	2.02324	1.4406
	Etv6	1.02101	1.00696	0.972655	1.12766	0.935191	0.819794
	GFI1B	1.08673	0.993092	0.926588	6.55835	6.88441	6.33495
	FOS	0.97041	0.983957	1.04729	1.31039	1.13288	1.11729
	GATA2	1.03288	0.799221	1.21139	1.29235	1.17283	1.12506
	SUZ12	0.943874	1.0693	0.990801	1.15669	1.25701	1.19748
	GATA3	0.946058	0.946058	1.11729	0.848704	0.775572	0.764895
	EED	0.988514	0.981686	1.03049	0.750886	0.750886	0.7457
	GATA4	0.860551	0.99539	1.16743	1.74917	1.56555	1.36289
	EZH2	0.922316	0.928731	1.16743	1.45062	1.45062	1.43065

## Sheet: Figure 8E
		WT			K20R
		Rep.1	Rep.2	Rep.3	Rep.1	Rep.2	Rep.3
	EZH2	0.593437	0.245156	0.35423	1.15322	1.02268	0.821387
	SUZ12	0.02249	0.046786	0.112223	0.33193	0.496925	0.483325
	EED	0.61031	0.347076	0.415784	1.27948	1.01816	0.735347
	GFI1B	0.005099	0.034962	0.199812	0.567287	0.803112	0.791242
	EZH2
	SUZ12
	EED
	GFI1B
