# Supplementary material for: A methylation-phosphorylation switch controls EZH2 stability and hematopoiesis
Source: eLife. 2024 Feb 12;13:e86168. doi: 10.7554/eLife.86168 (PMC10901513; doi:10.7554/eLife.86168)
Supplement: Supplementary file 1. [file elife-86168-supp1.xlsx]

## Sheet: Sheet2
Gene	sequence
mEed-RT F	GCTTGCATTGGGCAATCAGG
mEed-RT R	CGCGCCACATTTATGATGGG
mSuz12-RT F	CTCTTCGATGGACAGGAGAAACC
mSuz12-RT R	GCTCTGTAGTCAGCGTCTCCTT
mEzh2-RT F	AGTGACTTGGATTTTCCAGCAC
mEzh2-RT R	AATTCTGTTGTAAGGGCGACC
mGAPDH F	TCCCACTCTTCCACCTTCGATGC
mGAPDH R	TCTGGGATGGAAATTGTGAGG
mActin F	GTTACCAACTGGGACGACA
mActin R	CCAGAGGCATACAGGGAC
mGFI1 F	CCTCCGTGTCTCCAGCGTCG
mGFI1 R	GCGCTGCACTGCCGATAGCT
mGFI1B F	GTGTGGAGGTTCGTGGCTCTCGGG
mGFI1B R	GGGGCTGGTGGTAAGTGTGTGCCT
mGATA2 F	CACCCCTAAGCAGAGAAGCAA
mGATA2 R	TGTGGCACCACAGTTGACA
mGATA3 F	CGGGTTCGGATGTAAGTCGA
mGATA3 R	GTAGAGGTTGCCCCGCAGT
mGATA4 F	GTGGCCCTGGCGCCTTCATG
mGATA4 R	TCCCAGGCCCTGCACCCGAC
mcFOS F	ATGGGCTCTCCTGTCAACAC
mcFOS R	GCTGTCACCGTGGGGATAA
mEtv6 F	GCCATGCCCATTGGGAGAATA
mEtv6 R	AAGTTTTCGTACCGGCTGTCA
mLSD1 F	TCAGTTTGTGCCACCTCTTC
mLSD1 R	GAACACACGGTCAAAGCATAAC
mGATA1 F	GAACTGTGGAGCAACGGCTA
mGATA1 R	GGCCGGTTCTGACCATTCAT
mIKAROS F	GCAGAGAGGTCCCTTGTCCTG
mGATA1 R	GTCCATCACGTGGGATGTCA
mFOG F	GTACCGTAGTGAGCGGAACC
mFOG R	TGGGGTAGGTCTCTTTGGGT
mRUNX1 F	CCATCACCTCTTCCTCTGTCCA
mRUNX1 R	ACGGCAGAGTAGGGAACTGG
qPCR-ATF4-F	TGGAAACCATGCCAGATGAG
qPCR-ATF4-R	GATGGCCAATTGGGTTCACT
qPCR-IKZF1-F	AGGCATTCGACTTCCTAACGG
qPCR-IKZF1-R	CAGGAGGTTGCCTTTCTGGG
qPCR-NTRK3-F	GCCTGCTCTTCAACAAGCCC
qPCR-NTRK3-R	CAGTGATAGGAGGTGTAGGGC
qPCR-BGN-F	GCCTGAGTTTTCTGCCTACCC
qPCR-BGN-R	CCCTCTTGACTCCGAAGCCC
qPCR-Bmi1-F	ATCCCCACTTAATGTGTGTCCT
qPCR-Bmi1-R	CTTGCTGGTCTCCAAGTAACG
qPCR-IL6ra-F	TGCTCCCTGAATGATCACCT
qPCR-IL6ra-R	GAGAGCTTGGGCTCCTCTG
mMmp9-QF	GCAGAGGCATACTTGTAC
mMmp9-QR	TCCAGTATGTGATGTTATG
mLpl-QF	ACATCGGAGAACTGCTCA
mLpl-QR	TCCTCTCGATGACGAAGC
mIrf8-QF	ATCAGGAGGTGGATGCTTC
mIrf8-QR	TCAGAGCACAGCGTAACCTC
mSlc4a8-QF	GGCAGCAGTACCATGAGAT
mSlc4a8-QR	GTCCAGGAACTCGTCAATC
mCacna1b-QF	TCACCGTCAACCGCTCGCT
mCacna1b-QR	TGTCATCTAGTCGCTCAGAC
mSyngap1-QF	CAACCGGAAGCTGGAAGAG
mSyngap1-QR	CATCAGCCTGCCAATGATGC
msulf2-QF	GTGACTGCCATAGAATCAGT
msulf2-QR	GCATGCTGCACGTATCGTTGT
mSptbn1-QF	GTGGGAGAACAGGCAAAACCTC
mSptbn1-QR	GGTGGGCATTTCAGTATGAGCC
mStrc-QF	CGTGCTCTGAGGAACAGCT
mStrc-QR	CGCTGCTCAGGACTCAGATAG
mRunx3-QF	ATGTGCCGGATGGAACGGT
mRunx3-QR	CACTTGGGTAGGGTTGGT
mPpfia4-QF	GATGAGAAGGTGCGAGAGC
mPpfia4-QR	AGTGTCATCTTTCCACAG
mSET7-QF	TCCAAGAGTTCACACCTGCG
mSET7-QR	TTCCCCAAACTCGGCATTCA
mL3MBTL3-QF	GACAACTGGGATGAGAGCTATG
mL3MBTL3-QR	AGGGTTCTTCTGTGCTCTTTAC
mDCAF5-QF	CCGCTGCTCCTATATCTCTTAC
mDCAF5-QR	GTTGTCTTTGTGGCTGGTTC
